# Supplementary material
Source: publisher figshare collection journal article supplement (https://diabetesjournals.figshare.com/articles/dataset/_/19337927)
Supplement: Supplementary file 1 [file 1]

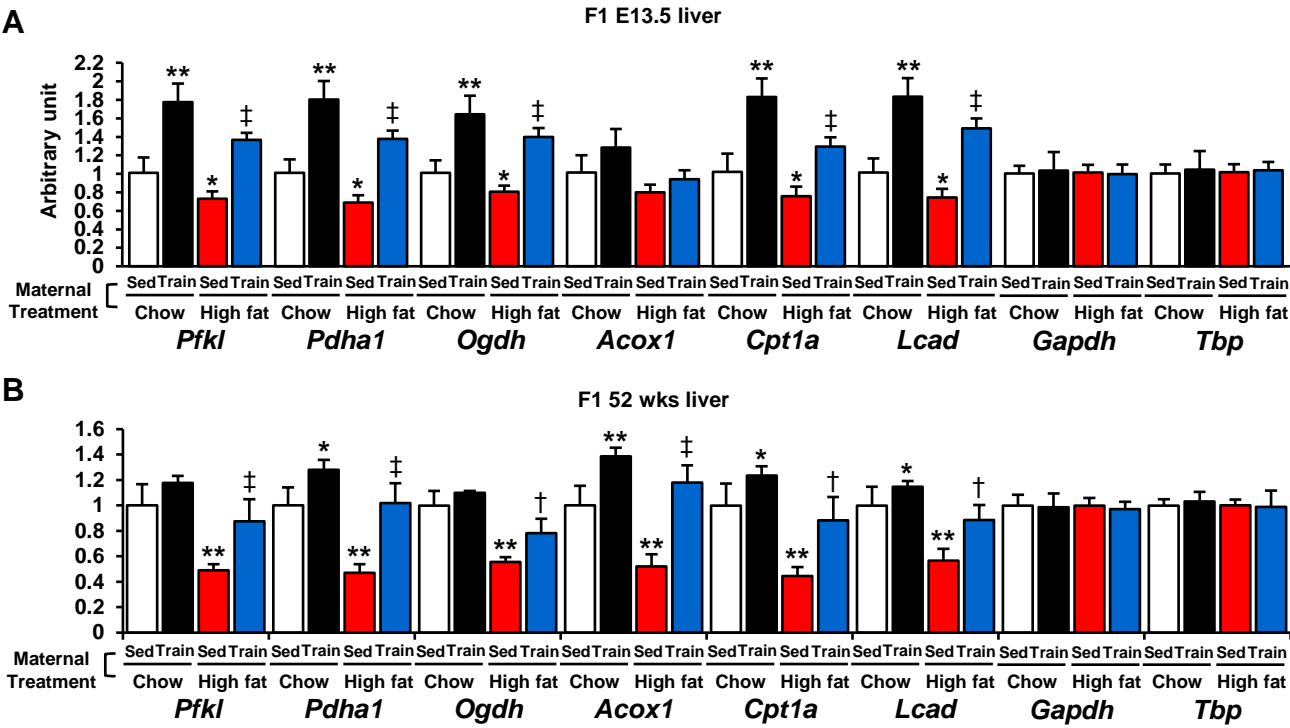

**Supplemental Figure 2: mRNA expression of glucose metabolism- and fatty acid metabolism-related genes in the offspring of sedentary or trained, chow- or high fat diet-fed dams. A, B:** mRNA expression of hepatic metabolism genes in E13.5 embryo (A) and 52-week male (B) offspring of sedentary or trained, chow- or high fat diet-fed dams. (n=6, \*P < 0.025 vs Chow-Sed; \*\*P < 0.01 vs Chow-Sed; #P < 0.025 High Fat-Sed vs. High Fat-Train; ‡P < 0.01 High Fat-Sed vs. High Fat-Train) All data are reported as means  $\pm$  SEM. Statistical significance was determined by one- or two-way ANOVA, with Tukey and Bonferroni post hoc analysis.
