# Supplementary material
Source: publisher figshare collection journal article supplement (https://diabetesjournals.figshare.com/articles/dataset/_/19337927)
Supplement: Supplementary file 2 [file 1]

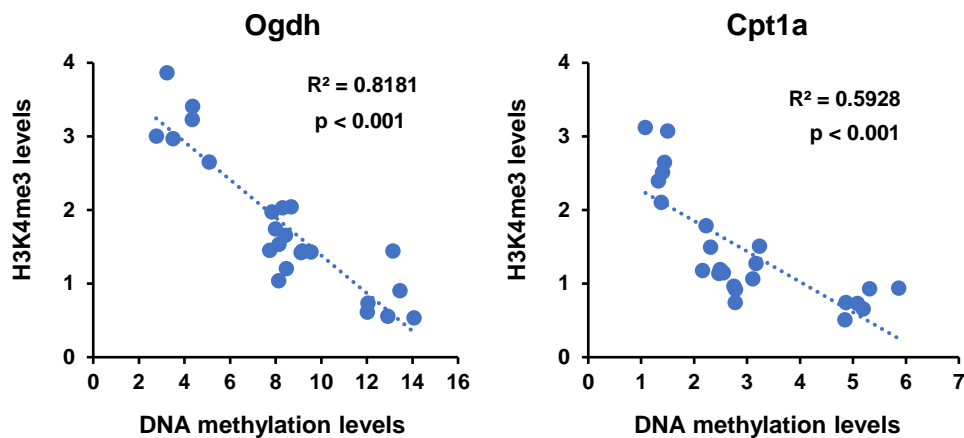

**Supplemental Figure 3: Correlation between DNA methylation levels and H3K4me3 levels at the promoter of hepatic genes in offspring.** The correlation between DNA methylation levels and H3K4me3 levels at the promoter of *Ogdh* and *Cpt1a* genes in E13.5 offspring liver. (\* $P < 0.001$ ) All data are reported as means  $\pm$  SEM. Statistical significance was determined by one- or two-way ANOVA, with Tukey and Bonferroni post hoc analysis.
