# Supplementary material
Source: publisher figshare collection journal article supplement (https://diabetesjournals.figshare.com/articles/dataset/_/19337927)
Supplement: Supplementary file 3 [file 1]

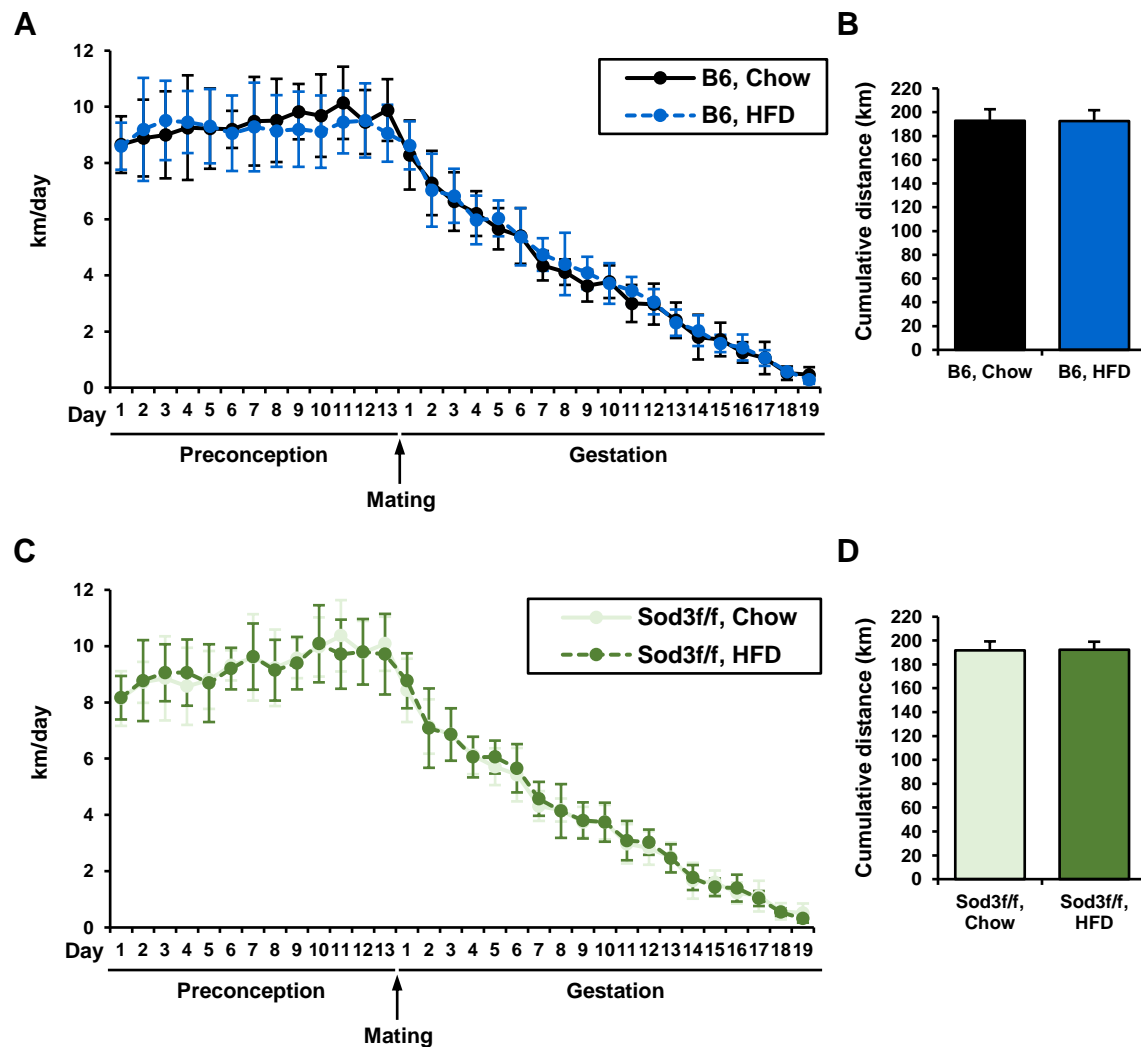

**Supplemental Figure 1: Running distance in trained, chow or HFD-fed C57BL/6 and *Sod3<sup>ff</sup>* dams.** A-B: Daily (A) and cumulative (B) running distance in trained, chow or HFD-fed C57BL/6 and *Sod3<sup>ff</sup>* female mice. All data are reported as means  $\pm$  SEM. Statistical significance was determined by one- or two-way ANOVA, with Tukey and Bonferroni post hoc analysis.
