# Supplementary material
Source: publisher figshare collection journal article supplement (https://diabetesjournals.figshare.com/articles/dataset/_/19337927)
Supplement: Supplementary file 4 [file 1]

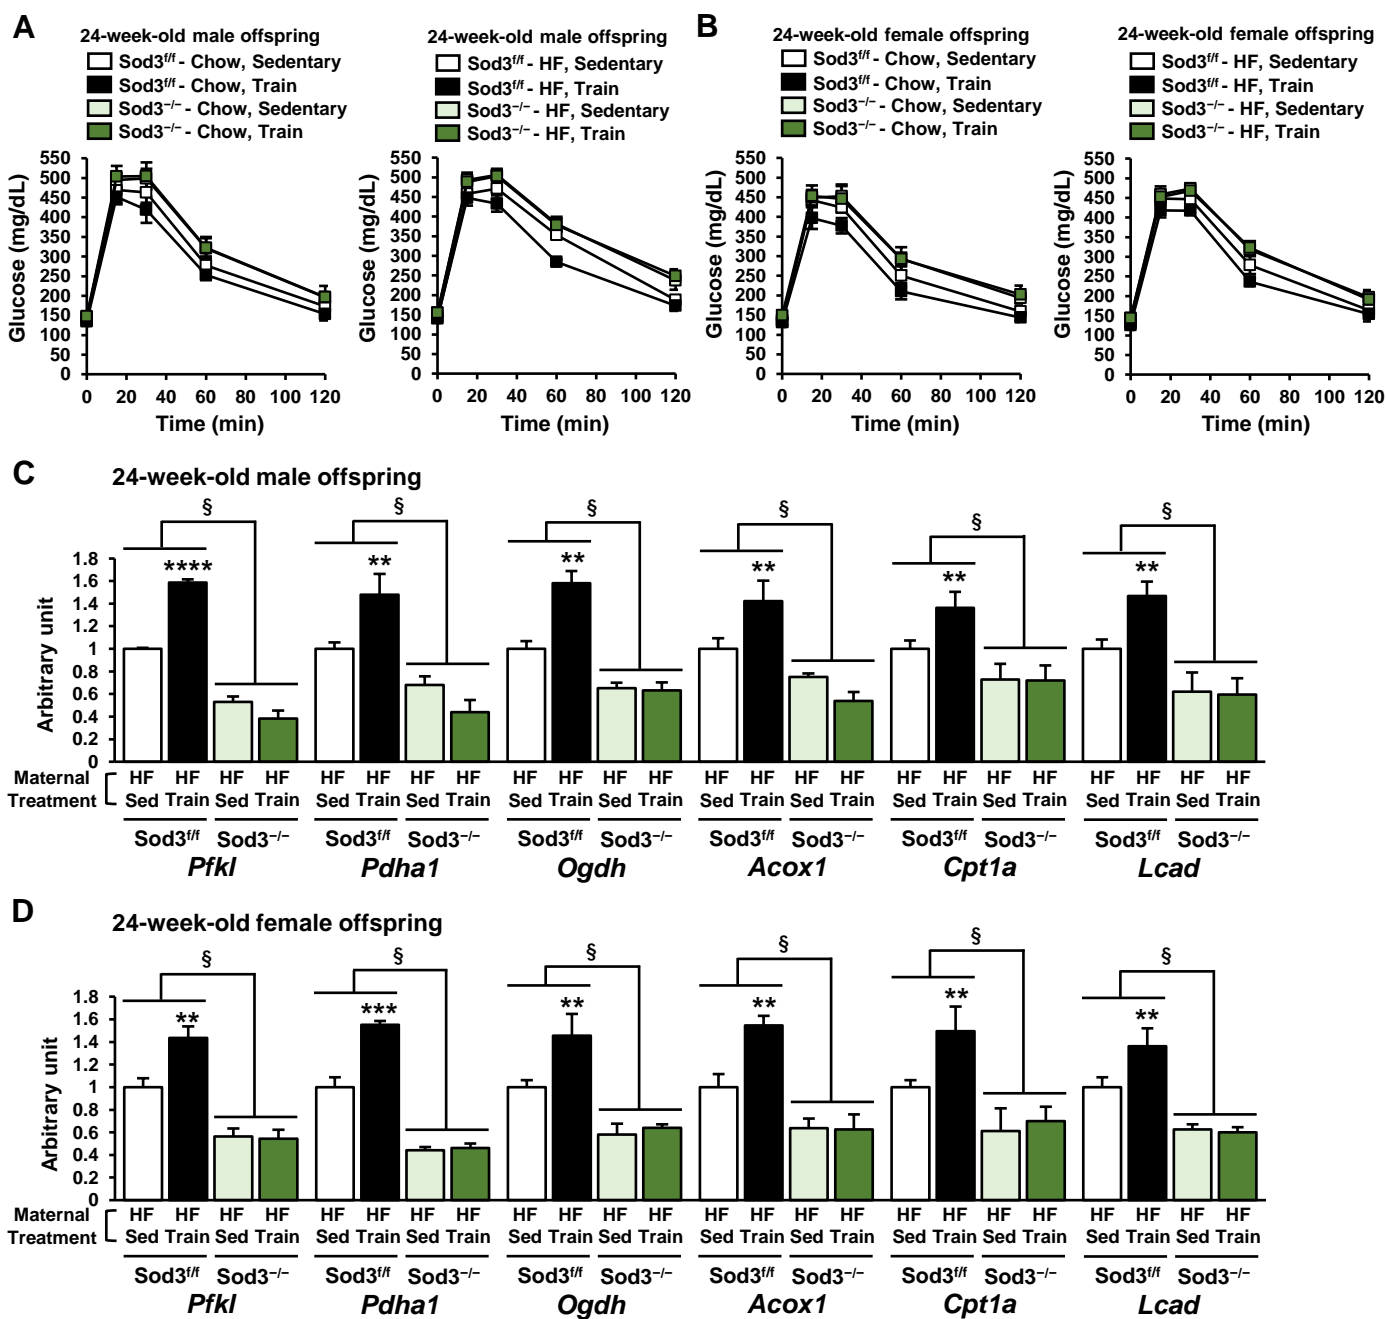

**Supplemental Figure 5: Glucose Metabolism in Sod3<sup>fl/fl</sup> and Sod3<sup>-/-</sup> offspring of sedentary or trained, chow- or high fat diet-fed dams.** A, B: Glucose excursion curves for male (A) and female (B) offspring at 24 weeks are shown. C, D) mRNA expression of hepatic metabolism genes in 16-week male (C) and female (D) Sod3<sup>fl/fl</sup> or Sod3<sup>-/-</sup> offspring of sedentary or trained high fat diet-fed dams. (HF; high fat diet, n=3, \*\*P<0.01 vs Sod3<sup>fl/fl</sup>-HF-Sed, \*\*\*P<0.001 vs Sod3<sup>fl/fl</sup>-HF-Sed, § P<0.01 effect of genotype). All data are reported as means ± SEM. Statistical significance was determined by one- or two-way ANOVA, with Tukey and Bonferroni post hoc analysis.
