# Supplementary material
Source: publisher figshare collection journal article supplement (https://diabetesjournals.figshare.com/articles/dataset/_/19337927)
Supplement: Supplementary file 5 [file 1]

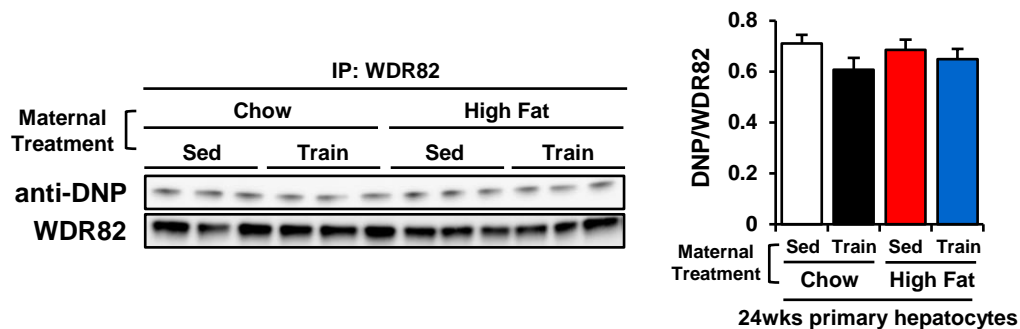

**Supplemental Figure 4: Effects of maternal diet and exercise on WDR82 carbonylation in the liver of adult offspring.** DNP immunoblotting of WDR82-immunoprecipitated proteins in livers of 24-weeks-old offspring of chow- or high fat diet-fed, sedentary or trained dams (n=3). All data are reported as means  $\pm$  SEM. Statistical significance was determined by one- or two-way ANOVA, with Tukey and Bonferroni post hoc analysis.
